# Supplementary material
Source: publisher site journal article supplement (https://www.dovepress.com/article/394695)
Supplement: Supplementary file 1 [file get_supplementary_file.php]

**Supplementary Table 1: Comparison of clinical parameters between diabetic and non-diabetic subjects among restenosis patients**.

|  | Restenosis | | | | | | | |
| --- | --- | --- | --- | --- | --- | --- | --- | --- |
|  | **Men** | | | | **Women** | | | |
|  | **Diabetic**  **464 (35.86%)** | **Non diabetic**  **830 (64.14%)** | **Total**  **1294** | **p.value** | **Diabetic**  **175 (46.54%)** | **Non diabetic**  **201 (54.46%)** | **Total**  **376** | **p.value** |
| Age | 64.069 (9.393) | 62.431 (10.760) | 63.018 (10.318) | **0.006** | 65.592 (9.231) | 67.816 (10.212) | 66.784 (9.819) | **0.029** |
| Weight | 82.844 (12.943) | 81.284 (13.599) | 81.843 (13.384) | **0.047** | 73.168 (12.759) | 71.144 (12.520) | 72.087 (12.655) | 0.129 |
| BMI | 29.163 (4.246) | 28.433 (4.141) | 28.695 (4.192) | **0.003** | 30.047 (4.900) | 30.049 (5.066) | 30.048 (4.982) | 0.996 |
| FBS | 158.751 (63.028) | 106.885 (34.277) | 126.840 (53.708) | **< 0.001** | 174.948 (67.283) | 104.037 (20.501) | 141.115 (61.763) | **< 0.001** |
| HDL | 35.082 (9.098) | 37.755 (10.351) | 36.760 (9.983) | **< 0.001** | 40.268 (11.801) | 46.660 (14.144) | 43.486 (13.399) | **< 0.001** |
| LDL | 101.596 (49.719) | 104.524 (43.684) | 103.441 (46.007) | 0.318 | 99.608 (40.698) | 104.297 (62.707) | 101.985 (52.971) | 0.455 |
| Total Cholesterol | 170.161 (44.982) | 173.837 (50.179) | 172.469 (48.322) | 0.230 | 177.634 (53.305) | 178.922 (61.826) | 178.280 (57.641) | 0.849 |
| Triglyceride | 175.014 (136.142) | 136.405 (103.972) | 150.128 (117.835) | **< 0.001** | 179.093 (164.883) | 111.352 (90.364) | 142.868 (134.575) | **< 0.001** |

Values are presented as n (%) or mean (SD). P.value is generated with χ2 test (categorical variables) and ANOVA (continuous variables). Restenosis: patients with coronary artery disease (CAD) >50% stenosis and stent deployment or coronary artery bypass graft (CABG) surgery. Stenosis: patients with coronary artery disease (CAD) >50% stenosis. FBS: fasting Blood sugar. Statistically significant values (p.value<0.05) are emphasized in bold.

**Supplementary Table 2: Comparison of clinical parameters between subjects with dyslipidemia and subjects without dyslipidemia among restenosis patients**.

|  | Restenosis | | | | | | | |
| --- | --- | --- | --- | --- | --- | --- | --- | --- |
|  | **Men** | | | | **Women** | | | |
|  | **Dyslipidemic**  **825 (64%)** | **Non dyslipidemic**  **471(36%)** | **Total**  **1296** | **p.value** | **Dyslipidemic**  **260 (69%)** | **Non dyslipidemic**  **116 (31%)** | **Total**  **376** | **p.value** |
| Age | 62.189 (10.013) | 64.463 (10.691) | 63.016 (10.319) | **< 0.001** | 66.023 (9.934) | 68.483 (9.378) | 66.784 (9.819) | **0.025** |
| Weight | 82.736 (13.620) | 80.288 (12.800) | 81.847 (13.375) | **0.002** | 72.322 (12.970) | 71.566 (11.968) | 72.087 (12.655) | 0.599 |
| BMI | 28.989 (4.191) | 28.176 (4.138) | 28.695 (4.189) | **< 0.001** | 30.268 (5.137) | 29.555 (4.598) | 30.048 (4.982) | 0.214 |
| FBS | 129.436 (57.956) | 122.535 (45.812) | 126.785 (53.685) | 0.109 | 143.899 (61.727) | 133.992 (62.008) | 141.115 (61.763) | 0.374 |
| HDL | 36.583 (10.069) | 37.073 (9.818) | 36.758 (9.978) | 0.442 | 43.196 (13.827) | 44.127 (12.451) | 43.486 (13.399) | 0.583 |
| LDL | 103.847 (50.147) | 102.624 (37.396) | 103.411 (45.995) | 0.679 | 103.418 (60.078) | 98.915 (33.035) | 101.985 (52.971) | 0.504 |
| Total Cholesterol | 174.341 (50.784) | 168.973 (43.340) | 172.431 (48.315) | 0.082 | 180.407 (64.542) | 173.606 (38.248) | 178.280 (57.641) | 0.352 |
| Triglyceride | 159.408 (124.069) | 133.574 (104.110) | 149.999 (117.811) | **< 0.001** | 150.902 (149.265) | 124.773 (91.411) | 142.868 (134.575) | 0.083 |

Values are presented as n (%) or mean (SD). P.value is generated with χ2 test (categorical variables) and ANOVA (continuous variables). Restenosis: patients with coronary artery disease (CAD) >50% stenosis and stent deployment or coronary artery bypass graft (CABG) surgery. Stenosis: patients with coronary artery disease (CAD) >50% stenosis. FBS: fasting Blood sugar. Statistically significant values (p.value<0.05) are emphasized in bold.

**Supplementary Table 3:** Allele frequencies of 44 SNPs that have been associated with CAD or T2D among Restenosis and Stenosis patients, and their association with restenosis among men, women and diabetic patients.

|  |  |  | **All** | | | | | | **Men** | | | | | | **Women** | | | | | **Diabetics** | | | | | | |
| --- | --- | --- | --- | --- | --- | --- | --- | --- | --- | --- | --- | --- | --- | --- | --- | --- | --- | --- | --- | --- | --- | --- | --- | --- | --- | --- |
|  |  |  | **Frequency** | | | **Logistic regression @** | | | **Frequency** | | | **Logistic regression #** | | | **Frequency** | | **Logistic regression #** | | | **Frequency** | | | **Logistic regression @** | | | |
| **SNP** | **A1** | **A2** | **Restenosis** | **Stenosis** | | **OR(95% CI)** | **P** | | **Restenosis** | **Stenosis** | | **OR(95% CI)** | **P** | | **Restenosis** | **Stenosis** | **OR(95% CI)** | **P** | | **Restenosis** | **Stenosis** | | **OR(95% CI)** | **P** | |
| rs11206510 | C | T | 0.17 | | 0.15 | 1.15 (0.96-1.37) | | 0.14 | 0.17 | | 0.15 | 1.11 (0.91-1.36) | | 0.32 | 0.18 | 0.14 | 1.32 (0.89-1.95) | | 0.16 | 0.17 | | 0.16 | 1.12 (0.86-1.46) | | 0.41 |
| rs599839 | G | A | 0.16 | | 0.17 | 0.88 (0.63-1.22) | | 0.44 | 0.15 | | 0.17 | 0.81 (0.55-1.18) | | 0.27 | 0.20 | 0.18 | 1.24 (0.62-2.48) | | 0.54 | 0.19 | | 0.16 | 1.18 (0.8-1.74) | | 0.40 |
| rs4845625 | T | C | 0.49 | | 0.44 | 1.23 (0.97-1.54) | | 0.08 | 0.48 | | 0.44 | 1.2 (0.93-1.56) | | 0.17 | 0.51 | 0.43 | 1.35 (0.82-2.2) | | 0.24 | 0.48 | | 0.43 | 1.23 (0.93-1.62) | | 0.14 |
| rs16944 | G | A | 0.38 | | 0.39 | 1.03 (0.81-1.29) | | 0.84 | 0.65 | | 0.62 | 1.17 (0.9-1.52) | | 0.24 | 0.49 | 0.60 | 0.59 (0.34-1.03) | | 0.06 | 0.61 | | 0.61 | 1.05 (0.78-1.4) | | 0.76 |
| rs3923113 | C | A | 0.31 | | 0.34 | 0.89 (0.75-1.05) | | 0.17 | 0.31 | | 0.33 | 0.9 (0.74-1.09) | | 0.28 | 0.33 | 0.37 | 0.83 (0.56-1.24) | | 0.37 | 0.31 | | 0.30 | 1.04 (0.78-1.39) | | 0.79 |
| rs2306374 | C | T | 0.13 | | 0.14 | 0.91 (0.75-1.1) | | 0.32 | 0.13 | | 0.15 | 0.9 (0.72-1.11) | | 0.31 | 0.13 | 0.13 | 0.96 (0.6-1.52) | | 0.85 | 0.13 | | 0.14 | 0.97 (0.73-1.29) | | 0.82 |
| rs9818870 | T | C | 0.12 | | 0.14 | 0.84 (0.59-1.2) | | 0.34 | 0.12 | | 0.14 | 0.92 (0.63-1.36) | | 0.69 | 0.08 | 0.13 | 0.52 (0.21-1.31) | | 0.17 | 0.11 | | 0.14 | 0.75 (0.48-1.17) | | 0.21 |
| rs273909 | G | A | 0.11 | | 0.09 | 1.19 (0.9-1.56) | | 0.22 | 0.10 | | 0.09 | 1.22 (0.9-1.65) | | 0.21 | 0.11 | 0.10 | 1.08 (0.59-1.98) | | 0.81 | 0.10 | | 0.09 | 1.05 (0.67-1.63) | | 0.84 |
| rs9369640 | A | C | 0.6 | | 0.56 | 1.24 (0.97-1.57) | | 0.08 | 0.58 | | 0.56 | 1.13 (0.86-1.47) | | 0.39 | 0.69 | 0.56 | 1.78 (1.04-3.05) | | 0.04 | 0.62 | | 0.57 | 1.27 (0.95-1.69) | | 0.10 |
| rs9349379 | G | A | 0.43 | | 0.40 | 1.16 (1.01-1.33) | | 0.03 | 0.41 | | 0.39 | 1.11 (0.95-1.29) | | 0.18 | 0.51 | 0.43 | 1.38 (1.02-1.86) | | 0.03 | 0.45 | | 0.40 | 1.26 (1.03-1.54) | | 0.02 |
| rs4252120 | C | T | 0.27 | | 0.27 | 0.98 (0.75-1.27) | | 0.85 | 0.28 | | 0.27 | 1.09 (0.81-1.45) | | 0.58 | 0.20 | 0.28 | 0.65 (0.35-1.21) | | 0.17 | 0.27 | | 0.28 | 0.96 (0.7-1.32) | | 0.80 |
| rs6968704 | T | C | 0.29 | | 0.31 | 0.87 (0.73-1.05) | | 0.14 | 0.29 | | 0.32 | 0.9 (0.74-1.1) | | 0.32 | 0.24 | 0.30 | 0.73 (0.47-1.14) | | 0.17 | 0.30 | | 0.33 | 0.86 (0.64-1.17) | | 0.34 |
| rs10486567 | A | G | 0.24 | | 0.26 | 0.86 (0.71-1.04) | | 0.12 | 0.25 | | 0.27 | 0.91 (0.74-1.12) | | 0.39 | 0.18 | 0.25 | 0.63 (0.39-1.03) | | 0.07 | 0.25 | | 0.27 | 0.92 (0.67-1.25) | | 0.58 |
| rs11556924 | T | C | 0.25 | | 0.26 | 0.91 (0.7-1.2) | | 0.52 | 0.26 | | 0.27 | 0.99 (0.73-1.34) | | 0.95 | 0.18 | 0.26 | 0.64 (0.34-1.18) | | 0.15 | 0.23 | | 0.26 | 0.83 (0.59-1.16) | | 0.27 |
| rs972283 | G | A | 0.43 | | 0.41 | 0.94 (0.74-1.19) | | 0.59 | 0.57 | | 0.59 | 0.89 (0.69-1.16) | | 0.39 | 0.59 | 0.57 | 1.11 (0.65-1.9) | | 0.70 | 0.55 | | 0.61 | 0.79 (0.59-1.05) | | 0.10 |
| rs264 | A | G | 0.15 | | 0.11 | 1.37 (1.08-1.74) | | 0.01 | 0.15 | | 0.11 | 1.40 (1.08-1.82) | | 0.01 | 0.12 | 0.10 | 1.22 (0.67-2.2) | | 0.52 | 0.15 | | 0.11 | 1.38 (0.92-2.06) | | 0.12 |
| rs4977574 | G | A | 0.63 | | 0.64 | 0.95 (0.83-1.09) | | 0.47 | 0.62 | | 0.64 | 0.93 (0.8-1.09) | | 0.37 | 0.65 | 0.64 | 1.03 (0.76-1.41) | | 0.85 | 0.64 | | 0.61 | 1.15 (0.94-1.41) | | 0.18 |
| rs579459 | C | T | 0.25 | | 0.23 | 1.13 (0.86-1.48) | | 0.38 | 0.27 | | 0.23 | 1.21 (0.9-1.64) | | 0.21 | 0.19 | 0.22 | 0.83 (0.44-1.54) | | 0.55 | 0.27 | | 0.23 | 1.24 (0.88-1.73) | | 0.22 |
| rs2505083 | C | T | 0.43 | | 0.44 | 0.93 (0.79-1.1) | | 0.41 | 0.43 | | 0.45 | 0.94 (0.79-1.13) | | 0.53 | 0.41 | 0.43 | 0.89 (0.61-1.3) | | 0.55 | 0.46 | | 0.44 | 1.11 (0.85-1.45) | | 0.45 |
| rs501120 | G | A | 0.28 | | 0.24 | 1.14 (0.89-1.47) | | 0.31 | 0.29 | | 0.24 | 1.24 (0.93-1.66) | | 0.14 | 0.22 | 0.26 | 0.83 (0.47-1.47) | | 0.52 | 0.28 | | 0.23 | 1.2 (0.88-1.64) | | 0.26 |
| rs1802295 | T | C | 0.24 | | 0.25 | 0.95 (0.82-1.11) | | 0.56 | 0.23 | | 0.26 | 0.89 (0.75-1.06) | | 0.19 | 0.27 | 0.23 | 1.28 (0.9-1.82) | | 0.17 | 0.25 | | 0.26 | 0.95 (0.75-1.19) | | 0.63 |
| rs11203042 | C | T | 0.46 | | 0.43 | 0.92 (0.81-1.05) | | 0.22 | 0.54 | | 0.56 | 0.92 (0.8-1.06) | | 0.26 | 0.56 | 0.57 | 0.93 (0.69-1.25) | | 0.63 | 0.54 | | 0.57 | 0.89 (0.73-1.08) | | 0.23 |
| rs2246833 | T | C | 0.38 | | 0.38 | 0.99 (0.83-1.17) | | 0.87 | 0.39 | | 0.38 | 1.03 (0.85-1.25) | | 0.76 | 0.33 | 0.37 | 0.81 (0.54-1.22) | | 0.31 | 0.36 | | 0.39 | 0.86 (0.65-1.14) | | 0.30 |
| rs7903146 | T | C | 0.37 | | 0.4 | 0.92 (0.8-1.05) | | 0.21 | 0.37 | | 0.40 | 0.88 (0.75-1.02) | | 0.09 | 0.42 | 0.40 | 1.09 (0.8-1.48) | | 0.60 | 0.43 | | 0.44 | 0.94 (0.77-1.14) | | 0.51 |
| rs11231693 | A | G | 0.05 | | 0.05 | 1.01 (0.58-1.73) | | 0.98 | 0.05 | | 0.05 | 0.9 (0.49-1.65) | | 0.73 | 0.06 | 0.04 | 1.65 (0.49-5.54) | | 0.42 | 0.03 | | 0.05 | 0.72 (0.34-1.51) | | 0.38 |
| rs964184 | C | G | 0.22 | | 0.21 | 0.93 (0.72-1.22) | | 0.61 | 0.78 | | 0.81 | 0.83 (0.62-1.11) | | 0.21 | 0.82 | 0.74 | 1.6 (0.83-3.08) | | 0.16 | 0.82 | | 0.78 | 1.25 (0.78-2) | | 0.36 |
| rs3184504 | T | C | 0.43 | | 0.42 | 0.99 (0.87-1.13) | | 0.88 | 0.44 | | 0.43 | 1.01 (0.87-1.17) | | 0.89 | 0.36 | 0.39 | 0.9 (0.67-1.23) | | 0.52 | 0.41 | | 0.41 | 0.99 (0.82-1.21) | | 0.95 |
| rs825476 | C | T | 0.39 | | 0.39 | 1.01 (0.88-1.15) | | 0.9 | 0.39 | | 0.39 | 1.01 (0.87-1.17) | | 0.91 | 0.39 | 0.39 | 1 (0.75-1.35) | | 0.98 | 0.40 | | 0.40 | 0.99 (0.81-1.21) | | 0.95 |
| rs9319428 | A | G | 0.31 | | 0.3 | 1.06 (0.89-1.26) | | 0.52 | 0.30 | | 0.30 | 0.98 (0.81-1.18) | | 0.82 | 0.38 | 0.29 | 1.52 (1.01-2.29) | | 0.04 | 0.35 | | 0.31 | 1.18 (0.89-1.56) | | 0.26 |
| rs9515203 | C | T | 0.16 | | 0.18 | 0.93 (0.69-1.25) | | 0.61 | 0.16 | | 0.18 | 0.91 (0.65-1.27) | | 0.57 | 0.18 | 0.17 | 1.07 (0.57-2.02) | | 0.84 | 0.16 | | 0.18 | 0.83 (0.57-1.19) | | 0.31 |
| rs7178572 | G | A | 0.38 | | 0.35 | 0.87 (0.74-1.03) | | 0.11 | 0.60 | | 0.65 | 0.82 (0.68-0.99) | | 0.04 | 0.67 | 0.64 | 1.11 (0.76-1.63) | | 0.59 | 0.63 | | 0.66 | 0.91 (0.68-1.2) | | 0.49 |
| rs7173743 | C | T | 0.5 | | 0.53 | 0.89 (0.79-1.02) | | 0.1 | 0.50 | | 0.54 | 0.88 (0.76-1.02) | | 0.08 | 0.50 | 0.51 | 0.97 (0.72-1.31) | | 0.85 | 0.51 | | 0.53 | 0.94 (0.78-1.15) | | 0.56 |
| rs2028299 | C | A | 0.26 | | 0.25 | 1.02 (0.88-1.19) | | 0.78 | 0.25 | | 0.26 | 1.01 (0.85-1.2) | | 0.87 | 0.26 | 0.25 | 1.06 (0.76-1.49) | | 0.72 | 0.27 | | 0.27 | 1.03 (0.83-1.29) | | 0.76 |
| rs17514846 | A | C | 0.46 | | 0.44 | 1.11 (0.97-1.26) | | 0.14 | 0.46 | | 0.44 | 1.1 (0.95-1.28) | | 0.20 | 0.48 | 0.45 | 1.13 (0.84-1.52) | | 0.42 | 0.46 | | 0.42 | 1.17 (0.97-1.43) | | 0.11 |
| rs758747 | T | C | 0.35 | | 0.35 | 0.98 (0.85-1.12) | | 0.74 | 0.36 | | 0.34 | 1.06 (0.91-1.23) | | 0.45 | 0.28 | 0.37 | 0.69 (0.50-0.95) | | 0.02 | 0.32 | | 0.36 | 0.81 (0.67-1.00) | | 0.04 |
| rs5880 | C | G | 0.02 | | 0.03 | 0.81 (0.38-1.71) | | 0.57 | 0.02 | | 0.02 | 0.88 (0.36-2.11) | | 0.77 | 0.02 | 0.04 | 0.69 (0.16-3.03) | | 0.62 | 0.03 | | 0.03 | 1.07 (0.47-2.43) | | 0.87 |
| rs7202877 | G | T | 0.05 | | 0.05 | 1.06 (0.78-1.44) | | 0.70 | 0.06 | | 0.05 | 1.21 (0.87-1.68) | | 0.27 | 0.03 | 0.05 | 0.55 (0.24-1.25) | | 0.15 | 0.05 | | 0.05 | 0.9 (0.58-1.41) | | 0.66 |
| rs4430796 | A | G | 0.46 | | 0.45 | 1.03 (0.9-1.18) | | 0.65 | 0.46 | | 0.45 | 1.04 (0.89-1.2) | | 0.65 | 0.45 | 0.44 | 1.02 (0.74-1.41) | | 0.91 | 0.45 | | 0.44 | 1.03 (0.84-1.25) | | 0.79 |
| rs7501939 | T | C | 0.43 | | 0.42 | 1.05 (0.92-1.2) | | 0.44 | 0.43 | | 0.41 | 1.07 (0.92-1.24) | | 0.40 | 0.44 | 0.45 | 0.99 (0.73-1.35) | | 0.97 | 0.45 | | 0.42 | 1.1 (0.91-1.34) | | 0.32 |
| rs11672433 | A | G | 0.14 | | 0.15 | 0.95 (0.79-1.15) | | 0.62 | 0.14 | | 0.14 | 0.99 (0.81-1.22) | | 0.96 | 0.14 | 0.16 | 0.83 (0.55-1.25) | | 0.37 | 0.14 | | 0.15 | 0.87 (0.67-1.14) | | 0.31 |
| rs2075650 | G | A | 0.06 | | 0.05 | 1.12 (0.84-1.49) | | 0.44 | 0.07 | | 0.05 | 1.29 (0.94-1.76) | | 0.11 | 0.03 | 0.05 | 0.52 (0.22-1.24) | | 0.14 | 0.06 | | 0.06 | 1.04 (0.69-1.58) | | 0.85 |
| rs445925 | T | C | 0.08 | | 0.09 | 0.87 (0.57-1.32) | | 0.5 | 0.08 | | 0.09 | 0.86 (0.54-1.37) | | 0.52 | 0.09 | 0.10 | 0.93 (0.37-2.32) | | 0.88 | 0.07 | | 0.08 | 0.85 (0.5-1.45) | | 0.56 |
| rs4420638 | G | A | 0.12 | | 0.11 | 1.05 (0.74-1.49) | | 0.79 | 0.12 | | 0.11 | 1.07 (0.72-1.58) | | 0.74 | 0.09 | 0.10 | 0.93 (0.4-2.16) | | 0.87 | 0.10 | | 0.10 | 0.97 (0.61-1.55) | | 0.91 |
| rs4812829 | A | G | 0.2 | | 0.21 | 0.93 (0.76-1.14) | | 0.49 | 0.21 | | 0.20 | 1.01 (0.8-1.27) | | 0.94 | 0.18 | 0.25 | 0.67 (0.42-1.08) | | 0.10 | 0.20 | | 0.22 | 0.91 (0.65-1.26) | | 0.57 |

CHR: Chromosome, SNPs: single nucleotide polymorphisms, BP: Base Pair, A1: mutant allele. A2: normal allele. P: P-value. OR: odd ratio. Frequency: mutant allele frequency. C.I.: confidence interval for odds ratio. @: adjusted for age and sex. #: adjusted for age. Stenosis: Patients with coronary artery disease with at least 50% obstruction in any of the coronary arteries visualized and had no history of percutaneous stent deployment. Restenosis: Patients with coronary artery disease with at least 50% obstruction in any of the coronary arteries visualized and had a history of percutaneous stent deployment. OR >1: A1 allele increases the risk of restenosis.
